# Supplementary material for: Combined ATR and DNA-PK Inhibition Radiosensitizes Tumor Cells Independently of Their p53 Status
Source: Front Oncol. 2018 Jul 13;8:245. doi: 10.3389/fonc.2018.00245 (PMC6053502; doi:10.3389/fonc.2018.00245)
Supplement: Supplementary file 2 [file Image_2.PDF]

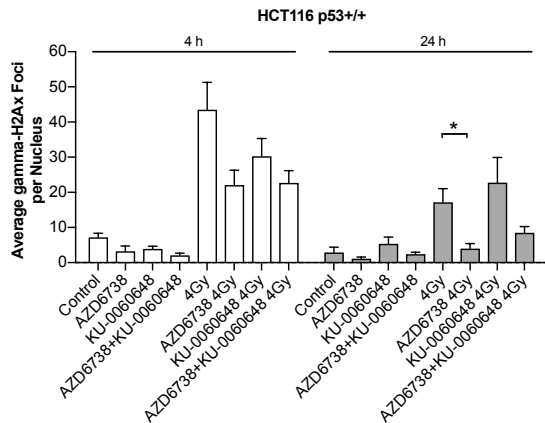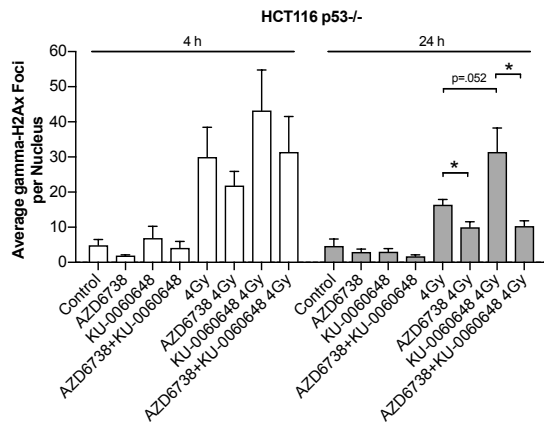

**Figure S2. Modulation of  $\gamma$ H2Ax DNA repair focus formation by DNAPKi and ATRi in combination with radiation.** Nuclear  $\gamma$ H2Ax foci were imaged by confocal microscopy. Fixed samples were collected at the time points and treatments indicated in HCT116 p53+/+ and p53-/- isogenic cell lines. 250 nM was used for both AZD6738 and KU-0060648, added 1 h before radiation.  $\gamma$ H2Ax foci were quantified by automated image quantification and expressed as the average foci per nucleus with nuclear segmentation and counting based on DAPI staining. Data represent a minimum of 3 independent independent experiments  $\pm$  SEM. Statistical analysis performed between indicated conditions by unpaired t-test \* =  $P < 0.05$ .
